# Supplementary material
Source: PubMed Central journal article supplement (PMC1074722)

## **Supplementary Information for:**

### **Site-specific incorporation of *N*-(deoxyguanosin-8-yl)-2-acetylaminofluorene (dG-AAF) into oligonucleotides using modified "ultra-mild" DNA synthesis.**

**Ludovic C. J. Gillet, Jawad Alzeer and Orlando D. Schärer\***

Institute for Molecular Cancer Research, University of Zürich, August Forel Strasse 7,  
8008 Zürich, Switzerland

- p. 1**            **Information on MS analyses**
- p. 2**            **HPLC trace of purification of 24-AAF**
- p. 3-6**        **ESI-MS Spectra of oligonucleotides listed in Table 2**

#### **INFORMATION ON MS ANALYSES**

The NMR Spectra were recorded on a Bruker ARX-300 MHz, the HR-MALDI on an Ionspec FT MS Ultima. The 9- and 24-mer were analyzed by nanoESI on a Micromass quadrupole time-of-flight (Q-TOF) mass spectrometer in negative mode; the 60-, 90- and 120-mer were analyzed by LC-ESI-MS in negative mode on a Q-TOF-Ultima coupled to Cap-LC (Waters); The LC step of the ESI-MS analysis was performed on a Waters Xterra RP-C18 column (5 µm, 0.32x50 mm), at 60°C with a flow rate of 8 µl/min, with a 0-50% B gradient over 15 min; Buffer A: 25 mM aq. Me<sub>2</sub>NBu.H<sub>2</sub>CO<sub>3</sub> (pH 8.4); Buffer B: CH<sub>3</sub>CN. The mass deconvolution was realized on the MaxEnt1 software.

# HPLC traces of 24-AAF: crude reaction mixture, after DMTr-On and DMTr-Off HPLC purification

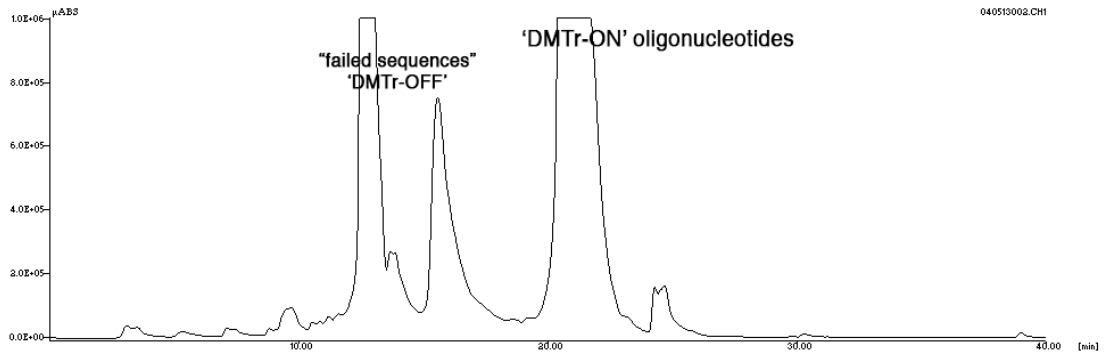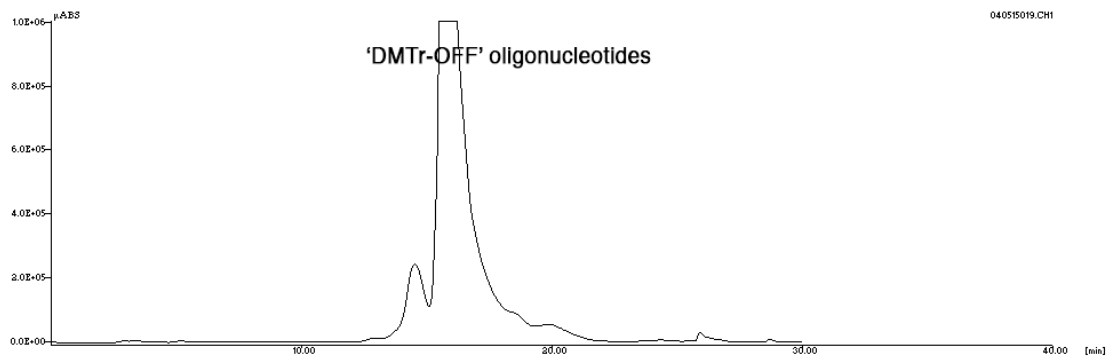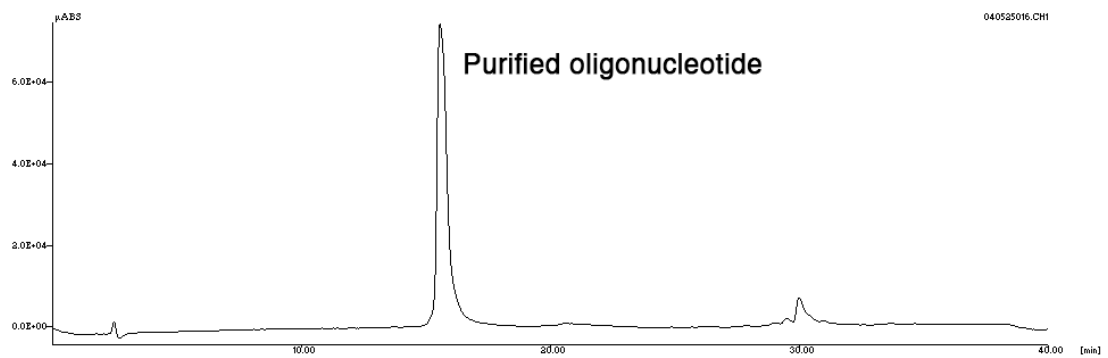

# ESI-MS spectra of 9-unmodified and 9-AAF

QTOF22-Mar-2004L. Gillet, 9unmod  
040322LG\_9UNMOD 7 (0.138)

TOF MS ES-  
6.54e3

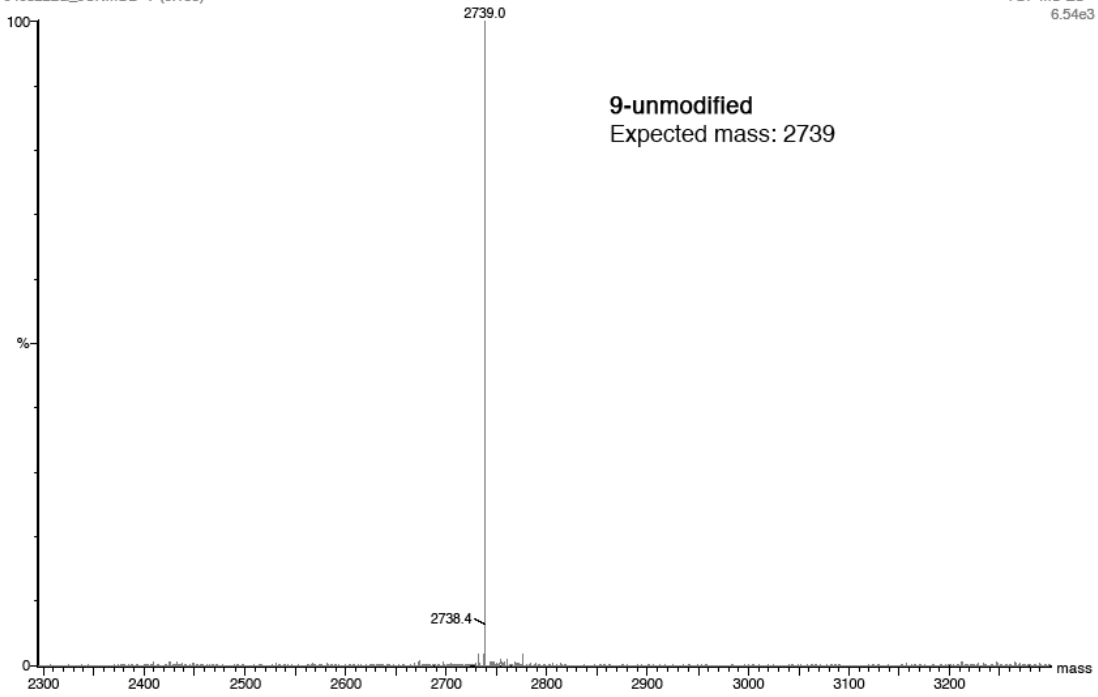

QTOF22-Mar-2004L. Gillet, 9AAF  
040322LG\_9AAF 20 (0.385)

TOF MS ES-  
2.63e3

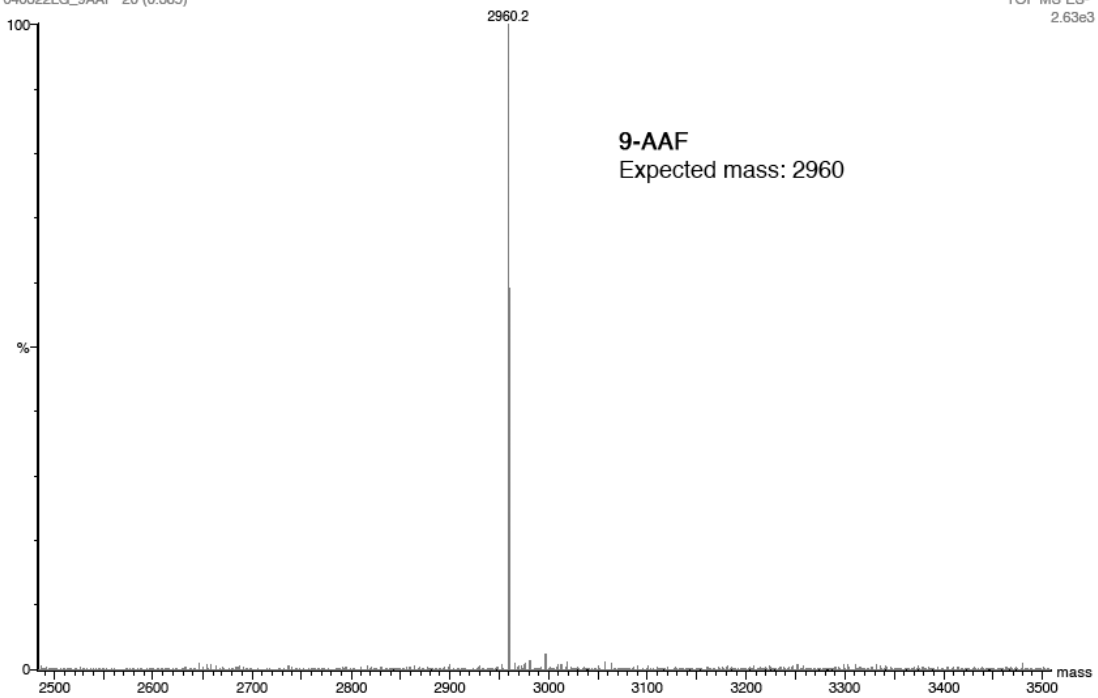

## ESI-MS spectra of 9-AF and 24-AAF

QTOF22-Mar-2004L. Gillet, 9AF  
040322LG\_9AF 12 (0.231)

TOF MS ES-  
3.45e3

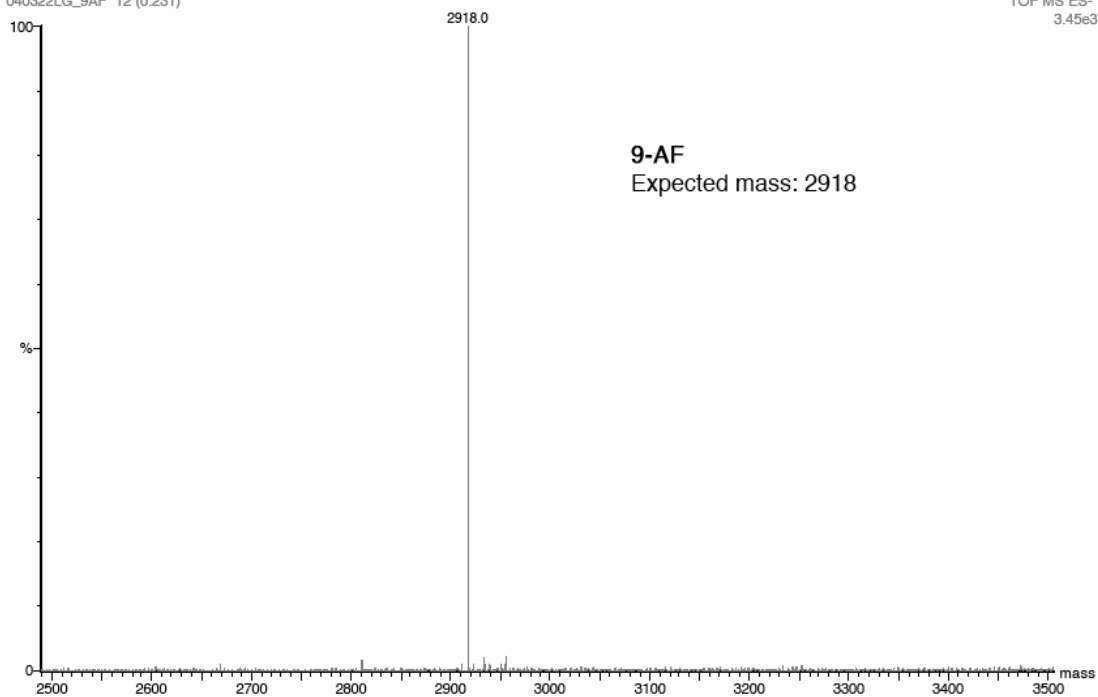

QTOF22-Mar-2004L. Gillet, 24AAF  
040322LG\_24AAF 10 (0.195)

TOF MS ES-  
2.45e3

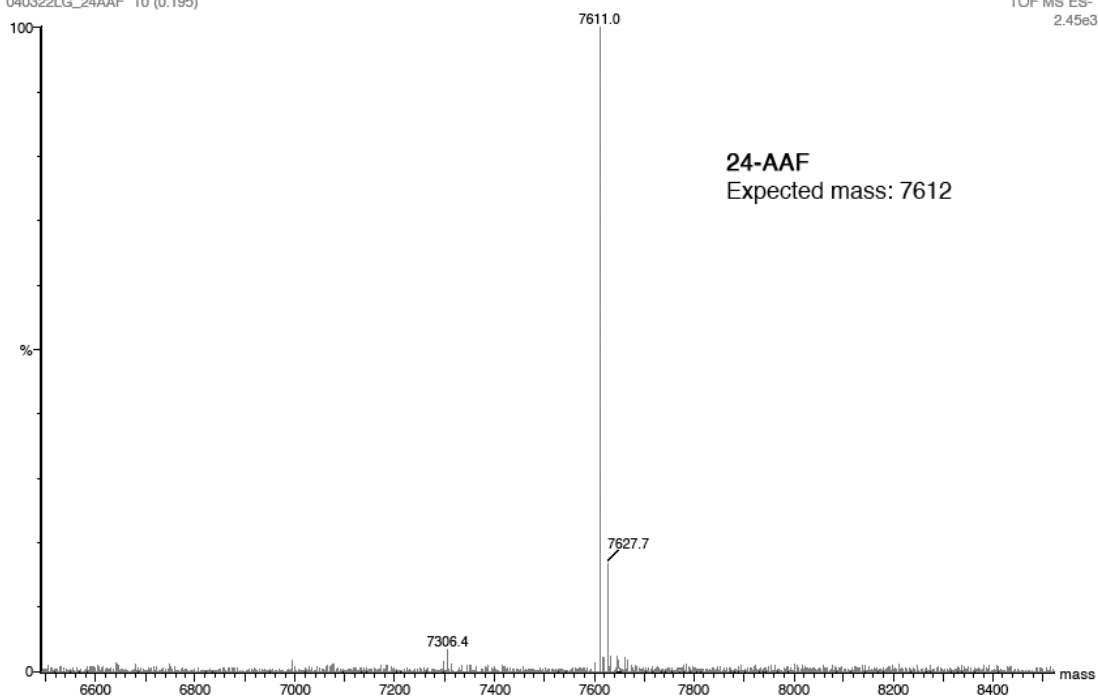

# ESI-MS spectra of 24-AF and 60-AAF

QTOF22-Mar-2004L. Gillet, 24AF  
040322LG\_24AF 7 (0.138)

TOF MS ES-  
3.51e3

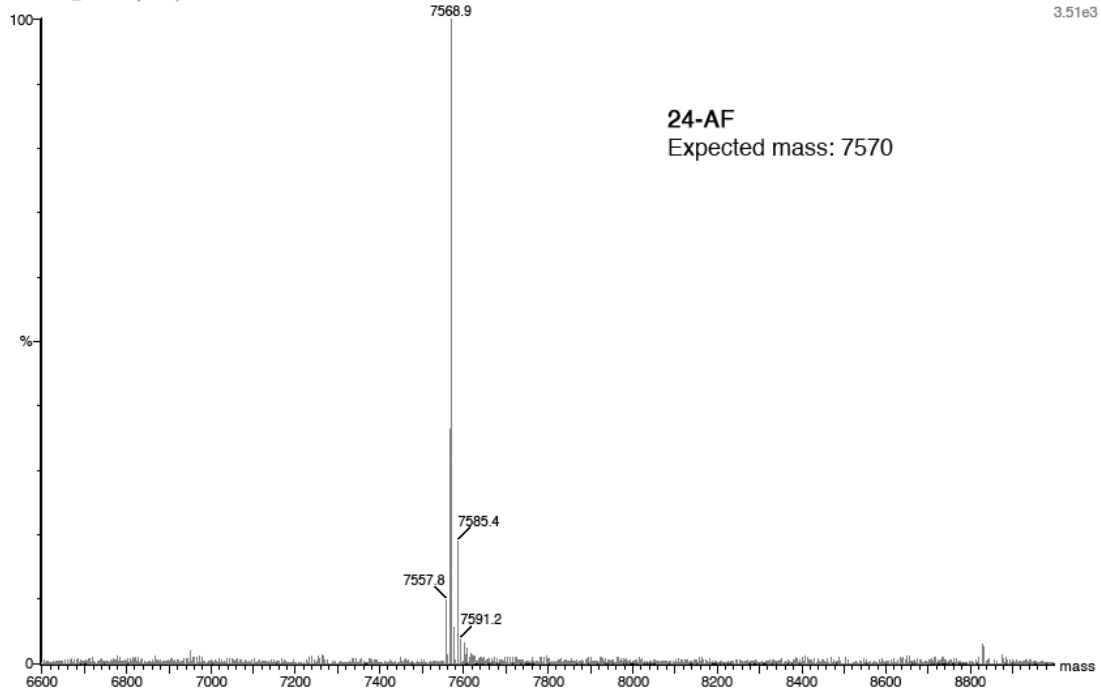

60AAF  
60AAF 930 (17.491) M1 [Ev-122799,t29] (Gs,0.300,600:2000,1.00,L33,R33); Cm (887:995)

1: TOF MS ES-  
1.15e5

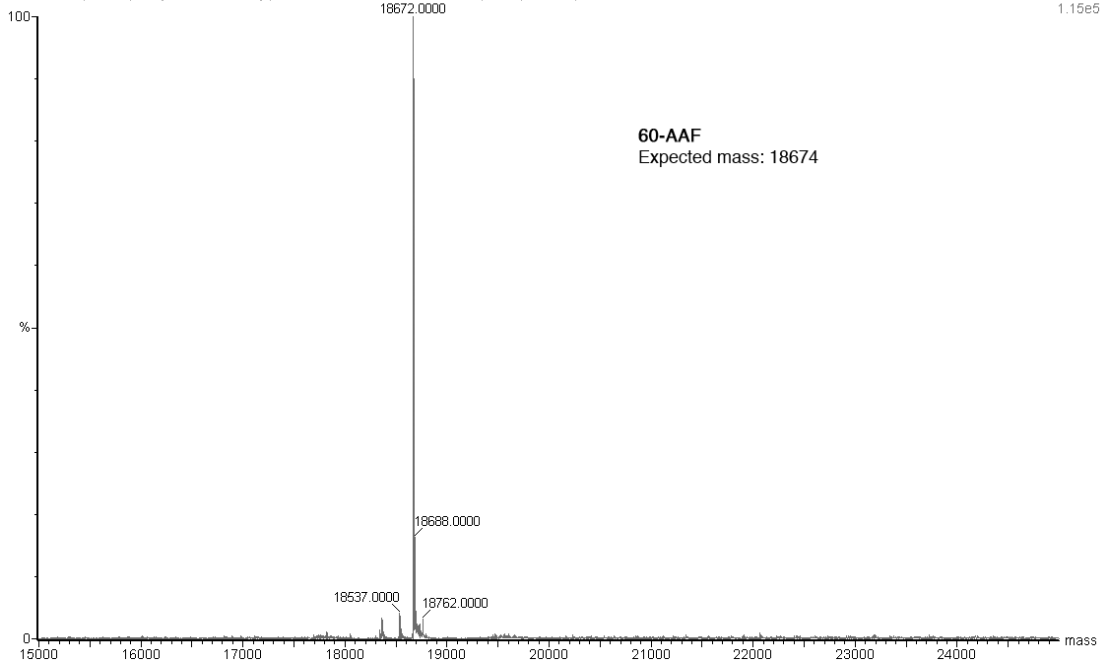

# ESI-MS spectra of 90-AAF and 120-AAF

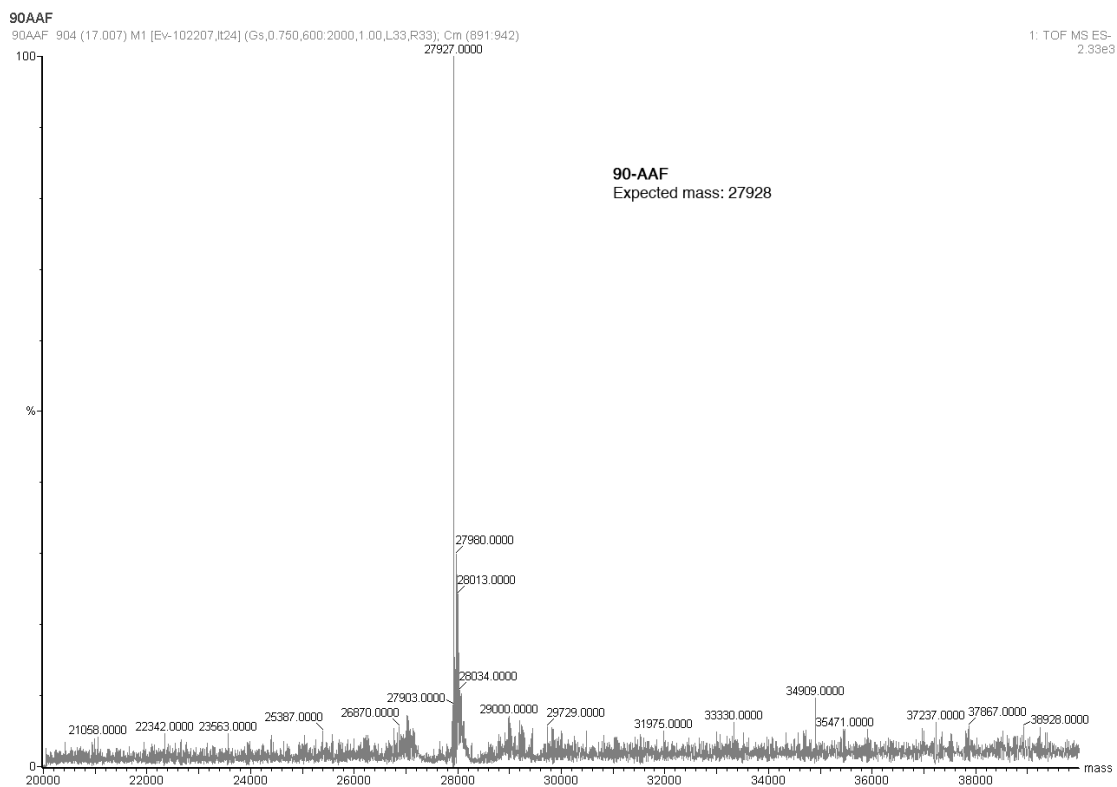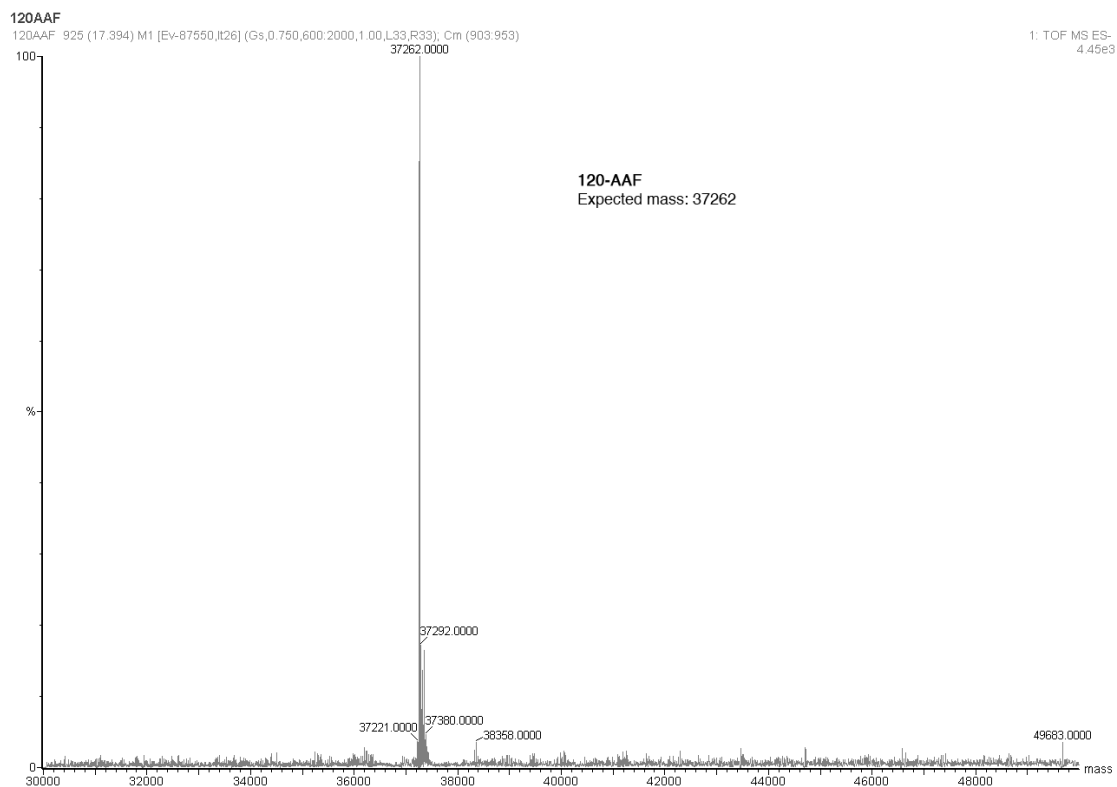

Supplement: nar_33_6_1961__1.pdf [file nar_33_6_1961__1.pdf]
